# Supplementary material for: Changes of Air Pollution between Countries Because of Lockdowns to Face COVID-19 Pandemic
Source: MDPI journal article supplement (doi:10.3390/app122412806), 2022-12-13
Supplement: s1 [file s1]

## Supplementary Materials

**Table S1.** Variation % in the concentration of air pollutants during the lockdown periods compared with baseline period (2015–2018) for 19 countries.

| Variation, % compared with baseline period (2015–2018) |           |                       |                       |                      |                         |                        |
|--------------------------------------------------------|-----------|-----------------------|-----------------------|----------------------|-------------------------|------------------------|
| <b>China</b>                                           | <b>CO</b> | <b>NO<sub>2</sub></b> | <b>SO<sub>2</sub></b> | <b>O<sub>3</sub></b> | <b>PM<sub>2.5</sub></b> | <b>PM<sub>10</sub></b> |
| Jan-19                                                 | -116.22   | -190.60               | -47.90                | -70.52               | -2.23                   | 12.90                  |
| Jan-20                                                 | 0.29      | -96.21                | -121.23               | -41.88               | 56.45                   | 57.48                  |
| Jan-21                                                 | -61.30    | -163.43               | -50.21                | -86.40               | 30.87                   | 43.55                  |
| Jan-22                                                 | -80.61    | -222.56               | -119.40               | -76.86               | 13.59                   | 15.18                  |
| Feb-19                                                 | -114.74   | -186.52               | -96.81                | -118.87              | -18.35                  | -4.05                  |
| Feb-20                                                 | -37.57    | -117.20               | -166.31               | -79.38               | 30.58                   | 23.89                  |
| Feb-21                                                 | 28.23     | -164.04               | -171.00               | -112.20              | 24.70                   | 16.47                  |
| Feb-22                                                 | -54.01    | -147.09               | -122.00               | -75.76               | 23.93                   | 18.00                  |
| Mar-19                                                 | -137.30   | -187.46               | -85.64                | -120.89              | -18.38                  | 5.99                   |
| Mar-20                                                 | 59.79     | -105.48               | -6.44                 | -94.08               | 18.16                   | 20.91                  |
| Mar-21                                                 | -49.61    | -125.53               | -83.67                | -96.35               | 33.02                   | 30.76                  |
| Mar-22                                                 | -33.10    | -139.14               | -108.38               | -73.96               | 12.84                   | 9.55                   |
| Average value                                          | -49.68    | -153.77               | -98.25                | -87.26               | 17.10                   | 20.89                  |
| Variation, % compared with baseline period (2015–2018) |           |                       |                       |                      |                         |                        |
| <b>South Korea</b>                                     | <b>CO</b> | <b>NO<sub>2</sub></b> | <b>SO<sub>2</sub></b> | <b>O<sub>3</sub></b> | <b>PM<sub>2.5</sub></b> | <b>PM<sub>10</sub></b> |
| Jan-19                                                 | -22.1     | -15.2                 | -50.1                 | 4.9                  | 21.5                    | 9.3                    |
| Jan-20                                                 | -36.2     | -37.1                 | -88.1                 | 3.5                  | 10.8                    | -22.1                  |
| Jan-21                                                 | -34.4     | -34.7                 | -102.6                | 4.1                  | 5.6                     | -14.4                  |
| Jan-22                                                 | -51.7     | -34.9                 | -113.1                | 8.6                  | 10.9                    | -21.7                  |
| Feb-19                                                 | -10.3     | -2.3                  | -14.0                 | 10.0                 | 4.7                     | -4.7                   |
| Feb-20                                                 | -11.0     | -12.2                 | -43.1                 | 3.3                  | -7.9                    | -29.3                  |
| Feb-21                                                 | -8.8      | -10.2                 | -55.7                 | 11.8                 | -6.8                    | -22.4                  |
| Feb-22                                                 | -44.0     | -18.4                 | -73.4                 | 11.6                 | -15.9                   | -32.7                  |
| Mar-19                                                 | -15.4     | -7.1                  | -15.1                 | 8.2                  | 2.3                     | 0.6                    |
| Mar-20                                                 | -27.4     | -27.4                 | -54.7                 | -3.7                 | -16.2                   | -22.7                  |
| Mar-21                                                 | -20.1     | -19.5                 | -72.2                 | 6.2                  | -6.3                    | 23.9                   |
| Mar-22                                                 | -39.4     | -26.0                 | -94.1                 | 2.6                  | -18.0                   | -18.4                  |
| Average value                                          | -26.7     | -20.4                 | -64.7                 | 5.9                  | -1.3                    | -12.9                  |
| Variation, % compared with baseline period (2015–2018) |           |                       |                       |                      |                         |                        |
| <b>India</b>                                           | <b>CO</b> | <b>NO<sub>2</sub></b> | <b>SO<sub>2</sub></b> | <b>O<sub>3</sub></b> | <b>PM<sub>2.5</sub></b> | <b>PM<sub>10</sub></b> |
| Jan-19                                                 | -111.4    | -30.5                 | -64.5                 | -13.2                | 21.5                    | 19.3                   |
| Jan-20                                                 | -109.5    | -53.3                 | -2.7                  | -19.3                | 12.5                    | 0.2                    |
| Jan-21                                                 | -122.4    | -24.7                 | -9.7                  | -23.9                | 21.9                    | 25.8                   |
| Jan-22                                                 | -147.3    | -86.4                 | -1.0                  | -34.0                | 15.1                    | 16.5                   |
| Feb-19                                                 | -131.5    | -41.3                 | -88.2                 | -40.9                | -4.0                    | -0.1                   |
| Feb-20                                                 | -114.5    | -24.1                 | 16.9                  | -17.0                | -3.6                    | 7.7                    |
| Feb-21                                                 | -88.2     | -7.3                  | -6.8                  | -36.9                | 14.1                    | 35.0                   |
| Feb-22                                                 | -128.9    | -54.0                 | 6.3                   | -17.6                | 9.4                     | 23.1                   |
| Mar-19                                                 | -94.9     | -34.5                 | -74.0                 | -33.6                | 9.4                     | -12.9                  |
| Mar-20                                                 | -84.0     | -69.4                 | -4.9                  | -32.0                | 2.7                     | -18.0                  |
| Mar-21                                                 | -75.0     | -1.3                  | 9.3                   | -23.8                | 27.8                    | 31.3                   |
| Mar-22                                                 | -62.7     | -44.2                 | 13.3                  | -1.9                 | 21.5                    | 29.5                   |
| Average value                                          | -105.9    | -39.3                 | -17.2                 | -24.5                | 12.4                    | 13.1                   |

| Variation, % compared with baseline period (2015–2018) |           |                       |                       |                      |                         |                        |
|--------------------------------------------------------|-----------|-----------------------|-----------------------|----------------------|-------------------------|------------------------|
| <b>Israel</b>                                          | <b>CO</b> | <b>NO<sub>2</sub></b> | <b>SO<sub>2</sub></b> | <b>O<sub>3</sub></b> | <b>PM<sub>2.5</sub></b> | <b>PM<sub>10</sub></b> |
| Jan-19                                                 | –190.6    | 16.4                  | –43.5                 | 22.9                 | 17.7                    | 20.1                   |
| Jan-20                                                 | 92.8      | 53.2                  | 87.4                  | 80.8                 | 62.9                    | 59.0                   |
| Jan-21                                                 | –165.5    | –6.2                  | –67.6                 | 3.3                  | 9.3                     | –18.2                  |
| Jan-22                                                 | –58.8     | 25.7                  | 29.0                  | 55.8                 | –11.6                   | –81.2                  |
| Feb-19                                                 | –171.8    | –3.9                  | –56.0                 | –3.6                 | –21.2                   | –38.2                  |
| Feb-20                                                 | 83.8      | 6.7                   | 63.3                  | 38.1                 | –1.9                    | 32.2                   |
| Feb-21                                                 | –225.8    | 5.3                   | 25.5                  | 57.3                 | –24.2                   | –95.4                  |
| Feb-22                                                 | –167.4    | 27.0                  | 22.6                  | 59.0                 | –31.2                   | –59.7                  |
| Mar-19                                                 | –211.6    | –0.6                  | –90.2                 | –8.4                 | –8.2                    | –26.1                  |
| Mar-20                                                 | –180.4    | –12.3                 | –154.1                | –8.0                 | –17.6                   | –15.8                  |
| Mar-21                                                 | –126.2    | 10.3                  | 17.9                  | 52.8                 | –26.7                   | 11.7                   |
| Mar-22                                                 | –143.5    | 25.8                  | 0.0                   | 50.1                 | –45.6                   | –14.6                  |
| Average value                                          | –122.1    | 12.3                  | –13.8                 | 33.3                 | –8.2                    | –18.8                  |
| Variation, % compared with baseline period (2015–2018) |           |                       |                       |                      |                         |                        |
| <b>Japan</b>                                           | <b>CO</b> | <b>NO<sub>2</sub></b> | <b>SO<sub>2</sub></b> | <b>O<sub>3</sub></b> | <b>PM<sub>2.5</sub></b> | <b>PM<sub>10</sub></b> |
| Jan-19                                                 | –18.5     | –7.0                  | –10.7                 | 3.5                  | –6.7                    | –15.3                  |
| Jan-20                                                 | –25.5     | –18.0                 | –45.2                 | –2.7                 | –14.6                   | –23.5                  |
| Jan-21                                                 | –32.2     | –12.6                 | –49.4                 | –2.7                 | –9.3                    | –17.0                  |
| Jan-22                                                 | –49.4     | –14.4                 | –56.2                 | 1.3                  | –21.3                   | –36.0                  |
| Feb-19                                                 | –7.7      | –8.7                  | –14.5                 | 1.5                  | 1.6                     | 3.1                    |
| Feb-20                                                 | –15.2     | –11.9                 | –27.9                 | –6.1                 | –9.7                    | 2.6                    |
| Feb-21                                                 | –23.9     | –12.2                 | –34.0                 | 3.5                  | –8.9                    | –16.0                  |
| Feb-22                                                 | –35.1     | –22.2                 | –50.3                 | 0.3                  | –20.2                   | –38.1                  |
| Mar-19                                                 | –19.2     | –12.4                 | –9.7                  | 0.6                  | –3.3                    | –5.6                   |
| Mar-20                                                 | –29.6     | –22.7                 | –50.0                 | –12.6                | –24.1                   | –17.9                  |
| Mar-21                                                 | –32.2     | –18.6                 | –54.4                 | –5.7                 | –14.3                   | –13.6                  |
| Mar-22                                                 | –5.4      | –18.9                 | –47.2                 | –3.2                 | –16.1                   | –16.3                  |
| Average value                                          | –24.5     | –15.0                 | –37.5                 | –1.8                 | –12.3                   | –16.1                  |
| Variation, % compared with baseline period (2015–2018) |           |                       |                       |                      |                         |                        |
| <b>Turkey</b>                                          | <b>CO</b> | <b>NO<sub>2</sub></b> | <b>SO<sub>2</sub></b> | <b>O<sub>3</sub></b> | <b>PM<sub>2.5</sub></b> | <b>PM<sub>10</sub></b> |
| Jan-19                                                 | –3.4      | 10.1                  | –21.0                 | –3.2                 | –19.9                   | –32.1                  |
| Jan-20                                                 | –30.7     | –19.9                 | 6.4                   | –10.8                | –51.5                   | –143.3                 |
| Jan-21                                                 | –7.2      | –4.1                  | –10.6                 | –27.2                | –55.5                   | –153.4                 |
| Jan-22                                                 | –44.9     | –8.3                  | –1.5                  | –37.1                | –57.3                   | –137.0                 |
| Feb-19                                                 | 3.2       | 6.3                   | –15.8                 | –10.0                | –8.0                    | –4.2                   |
| Feb-20                                                 | –41.1     | –22.9                 | 2.5                   | 12.2                 | –47.4                   | –147.7                 |
| Feb-21                                                 | –14.8     | –10.8                 | –4.1                  | –27.2                | –43.1                   | –147.0                 |
| Feb-22                                                 | –44.5     | –10.1                 | –7.0                  | –45.2                | –32.7                   | –132.2                 |
| Mar-19                                                 | 4.5       | 8.4                   | 3.1                   | –10.0                | –9.6                    | –18.0                  |
| Mar-20                                                 | –35.8     | –21.0                 | –14.4                 | –20.1                | –44.6                   | –157.4                 |
| Mar-21                                                 | –26.9     | –19.7                 | 9.9                   | –33.2                | –61.3                   | –158.5                 |
| Mar-22                                                 | –89.0     | –21.0                 | 0.3                   | –32.7                | –42.9                   | –149.8                 |
| Average value                                          | –27.6     | –9.4                  | –4.4                  | –20.4                | –39.5                   | –115.0                 |
| Variation, % compared with baseline period (2015–2018) |           |                       |                       |                      |                         |                        |
| <b>USA</b>                                             | <b>CO</b> | <b>NO<sub>2</sub></b> | <b>SO<sub>2</sub></b> | <b>O<sub>3</sub></b> | <b>PM<sub>2.5</sub></b> | <b>PM<sub>10</sub></b> |
| Jan-19                                                 | –25.6     | –5.7                  | –102.2                | 1.8                  | –5.3                    | 3.2                    |
| Jan-20                                                 | –17.7     | –9.5                  | –147.6                | 2.2                  | –13.3                   | –8.2                   |
| Jan-21                                                 | –32.9     | –16.4                 | –160.8                | 4.1                  | –0.8                    | 36.2                   |

|                                                        |           |                       |                       |                      |                         |                        |
|--------------------------------------------------------|-----------|-----------------------|-----------------------|----------------------|-------------------------|------------------------|
| Jan-22                                                 | -20.9     | -3.4                  | -104.1                | 5.9                  | -2.1                    | 14.3                   |
| Feb-19                                                 | -31.5     | -2.5                  | -134.3                | 57.0                 | 3.4                     | -7.8                   |
| Feb-20                                                 | -9.2      | -10.5                 | -130.6                | 4.4                  | -14.5                   | -15.6                  |
| Feb-21                                                 | -24.1     | -13.5                 | -134.3                | 6.0                  | -5.5                    | 8.1                    |
| Feb-22                                                 | -14.1     | -5.2                  | -83.9                 | 6.0                  | -3.8                    | 6.2                    |
| Mar-19                                                 | -13.7     | 13.7                  | -59.0                 | 56.2                 | 15.5                    | -8.8                   |
| Mar-20                                                 | 13.8      | -23.2                 | -136.9                | -6.8                 | -15.7                   | -46.7                  |
| Mar-21                                                 | -15.7     | -8.5                  | -46.0                 | 4.5                  | 0.2                     | 4.1                    |
| Mar-22                                                 | -14.1     | -6.7                  | -47.9                 | 3.7                  | -9.4                    | -12.4                  |
| Average value                                          | -17.1     | -7.6                  | -107.3                | 12.1                 | -4.3                    | -2.3                   |
| Variation, % compared with baseline period (2015–2018) |           |                       |                       |                      |                         |                        |
| <b>Canada</b>                                          | <b>CO</b> | <b>NO<sub>2</sub></b> | <b>SO<sub>2</sub></b> | <b>O<sub>3</sub></b> | <b>PM<sub>2.5</sub></b> | <b>PM<sub>10</sub></b> |
| Jan-19                                                 | -1010.0   | -21.9                 | -254.6                | -25.9                | -2.4                    | 41.5                   |
| Jan-20                                                 | 72.6      | 21.2                  | 51.0                  | 29.5                 | -7.9                    | -18.7                  |
| Jan-21                                                 | -1010.0   | -41.3                 | -265.7                | -6.9                 | -27.2                   | 15.3                   |
| Jan-22                                                 | -1010.0   | -36.9                 | -194.0                | 17.3                 | -110.5                  | -82.8                  |
| Feb-19                                                 | -990.0    | -6.7                  | -317.3                | -9.8                 | 9.1                     | 26.1                   |
| Feb-20                                                 | 68.9      | 22.8                  | 54.2                  | 24.9                 | 6.4                     | -1.4                   |
| Feb-21                                                 | -990.0    | -28.2                 | -413.2                | -5.4                 | -16.3                   | 1.7                    |
| Feb-22                                                 | -990.0    | -35.0                 | -278.4                | -18.0                | -94.3                   | -67.5                  |
| Mar-19                                                 | -975.0    | 1.6                   | -239.7                | -4.7                 | 18.5                    | 34.5                   |
| Mar-20                                                 | 71.1      | 13.9                  | 48.8                  | 19.4                 | 6.5                     | 19.7                   |
| Mar-21                                                 | -975.0    | -13.1                 | -268.0                | -11.8                | 2.5                     | 15.0                   |
| Mar-22                                                 | -128.7    | -42.1                 | -247.0                | 45.6                 | -112.3                  | -81.0                  |
| Average value                                          | -655.5    | -13.8                 | -193.7                | 4.5                  | -27.3                   | -8.1                   |
| Variation, % compared with baseline period (2015–2018) |           |                       |                       |                      |                         |                        |
| <b>Brazil</b>                                          | <b>CO</b> | <b>NO<sub>2</sub></b> | <b>SO<sub>2</sub></b> | <b>O<sub>3</sub></b> | <b>PM<sub>2.5</sub></b> | <b>PM<sub>10</sub></b> |
| Jan-19                                                 | -35.8     | 18.1                  | -106.2                | 25.2                 | 8.5                     | 7.9                    |
| Jan-20                                                 | -70.4     | -16.7                 | -184.8                | -17.3                | 5.3                     | -7.3                   |
| Jan-21                                                 | -79.5     | -8.3                  | -111.8                | 2.2                  | 0.9                     | -3.0                   |
| Jan-22                                                 | -78.8     | -3.9                  | -199.8                | -4.6                 | 26.5                    | -12.3                  |
| Feb-19                                                 | -15.1     | -9.6                  | -69.4                 | -6.9                 | 11.1                    | -26.1                  |
| Feb-20                                                 | -18.3     | -34.1                 | -46.5                 | -13.7                | -7.2                    | -21.6                  |
| Feb-21                                                 | 4.5       | -19.6                 | -19.5                 | 21.1                 | 20.2                    | -15.9                  |
| Feb-22                                                 | -50.4     | -6.5                  | -70.5                 | 11.5                 | 23.0                    | -1.7                   |
| Mar-19                                                 | -22.2     | -20.6                 | -6.5                  | 11.3                 | -0.4                    | -28.4                  |
| Mar-20                                                 | -112.3    | -24.1                 | 5.7                   | 5.9                  | -6.3                    | 9.2                    |
| Mar-21                                                 | -57.4     | -10.8                 | -122.9                | 18.4                 | 22.0                    | -4.9                   |
| Mar-22                                                 | -46.7     | 4.9                   | -135.3                | 3.3                  | -0.4                    | 11.9                   |
| Average value                                          | -48.5     | -10.9                 | -89.0                 | 4.7                  | 8.6                     | -7.7                   |
| Variation, % compared with baseline period (2015–2018) |           |                       |                       |                      |                         |                        |
| <b>Colombia</b>                                        | <b>CO</b> | <b>NO<sub>2</sub></b> | <b>SO<sub>2</sub></b> | <b>O<sub>3</sub></b> | <b>PM<sub>2.5</sub></b> | <b>PM<sub>10</sub></b> |
| Jan-19                                                 | -150.9    | -21.3                 | 39.8                  | -342.6               | -16.5                   | -37.3                  |
| Jan-20                                                 | -138.6    | 26.0                  | 32.2                  | -108.0               | -27.8                   | -36.8                  |
| Jan-21                                                 | -93.5     | 14.1                  | 35.7                  | -116.3               | -26.8                   | -54.8                  |
| Jan-22                                                 | -141.8    | 10.4                  | 93.9                  | -122.6               | -5.7                    | -61.9                  |
| Feb-19                                                 | 1.7       | -16.0                 | 74.2                  | 26.1                 | 31.7                    | 9.1                    |
| Feb-20                                                 | -9.9      | 28.6                  | 48.3                  | 58.1                 | 15.2                    | -36.9                  |
| Feb-21                                                 | 21.5      | 34.6                  | 69.8                  | 51.0                 | 2.5                     | -66.4                  |
| Feb-22                                                 | -24.5     | 26.8                  | 58.3                  | 53.5                 | 4.0                     | -78.3                  |

|                                                        |           |                       |                       |                      |                         |                        |
|--------------------------------------------------------|-----------|-----------------------|-----------------------|----------------------|-------------------------|------------------------|
| Mar-19                                                 | 42.5      | 22.8                  | 63.1                  | 23.7                 | -6.8                    | -7.9                   |
| Mar-20                                                 | -56.1     | 23.1                  | -39.0                 | 56.7                 | -19.8                   | -46.4                  |
| Mar-21                                                 | -3.4      | 46.5                  | -223.8                | 35.1                 | -49.8                   | -60.9                  |
| Mar-22                                                 | 0.0       | 32.3                  | -30.4                 | 33.8                 | -48.6                   | -76.7                  |
| Average value                                          | -46.1     | 19.0                  | 18.5                  | -29.3                | -12.4                   | -46.3                  |
| Variation, % compared with baseline period (2015–2018) |           |                       |                       |                      |                         |                        |
| <b>Chile</b>                                           | <b>CO</b> | <b>NO<sub>2</sub></b> | <b>SO<sub>2</sub></b> | <b>O<sub>3</sub></b> | <b>PM<sub>2.5</sub></b> | <b>PM<sub>10</sub></b> |
| Jan-19                                                 | 41.1      | -8.1                  | 15.7                  | 22.1                 | -11.6                   | 26.7                   |
| Jan-20                                                 | 13.2      | -10.4                 | -0.7                  | 14.7                 | -13.7                   | 18.3                   |
| Jan-21                                                 | 22.5      | -17.8                 | 16.4                  | -14.2                | 25.7                    | 8.9                    |
| Jan-22                                                 | -10.6     | -54.2                 | -132.1                | -13.6                | 22.5                    | 22.6                   |
| Feb-19                                                 | 18.3      | -1.8                  | 6.9                   | 28.3                 | -1.8                    | 37.4                   |
| Feb-20                                                 | 5.8       | -3.7                  | -9.6                  | 22.1                 | -11.3                   | 10.4                   |
| Feb-21                                                 | -32.7     | -10.0                 | -64.7                 | -10.4                | 25.9                    | -13.7                  |
| Feb-22                                                 | 8.3       | -19.8                 | -81.7                 | 5.8                  | 29.8                    | 6.8                    |
| Mar-19                                                 | -0.8      | -3.3                  | 10.2                  | 8.3                  | -11.9                   | 23.8                   |
| Mar-20                                                 | 2.9       | -29.0                 | 16.3                  | 23.5                 | -21.3                   | -1.7                   |
| Mar-21                                                 | -25.6     | -22.3                 | -26.9                 | -11.7                | 33.3                    | 24.5                   |
| Mar-22                                                 | 9.6       | -8.9                  | -42.6                 | 5.9                  | 37.6                    | 36.8                   |
| Average value                                          | 4.3       | -15.8                 | -24.4                 | 6.7                  | 8.6                     | 16.7                   |
| Variation, % compared with baseline period (2015–2018) |           |                       |                       |                      |                         |                        |
| <b>Germany</b>                                         | <b>CO</b> | <b>NO<sub>2</sub></b> | <b>SO<sub>2</sub></b> | <b>O<sub>3</sub></b> | <b>PM<sub>2.5</sub></b> | <b>PM<sub>10</sub></b> |
| Jan-19                                                 | -110.0    | -5.9                  | -79.3                 | 8.6                  | -19.5                   | 17.4                   |
| Jan-20                                                 | -110.0    | -0.3                  | -73.8                 | -0.7                 | -4.7                    | 30.6                   |
| Jan-21                                                 | -110.0    | -27.6                 | -105.7                | -1.2                 | -32.2                   | -22.5                  |
| Jan-22                                                 | -110.0    | -30.3                 | -191.1                | 13.5                 | -27.3                   | -17.7                  |
| Feb-19                                                 | -162.5    | 19.8                  | -74.2                 | 6.2                  | 7.5                     | 33.3                   |
| Feb-20                                                 | -162.5    | -10.6                 | -140.9                | 21.9                 | -73.3                   | -34.3                  |
| Feb-21                                                 | -162.5    | -13.6                 | -69.6                 | 4.3                  | -24.7                   | 16.5                   |
| Feb-22                                                 | -162.5    | -25.1                 | -147.8                | 25.9                 | -89.5                   | -24.9                  |
| Mar-19                                                 | -132.5    | -1.6                  | -99.3                 | 13.7                 | -22.5                   | -11.7                  |
| Mar-20                                                 | -132.5    | -19.4                 | -26.4                 | 5.8                  | -41.4                   | -19.0                  |
| Mar-21                                                 | -132.5    | -13.2                 | -85.9                 | 4.2                  | -29.8                   | -3.6                   |
| Mar-22                                                 | -132.5    | -10.6                 | -12.3                 | 15.8                 | 2.1                     | 16.4                   |
| Average value                                          | -135.0    | -11.5                 | -92.2                 | 9.8                  | -29.6                   | -1.6                   |
| Variation, % compared with baseline period (2015–2018) |           |                       |                       |                      |                         |                        |
| <b>Netherlands</b>                                     | <b>CO</b> | <b>NO<sub>2</sub></b> | <b>SO<sub>2</sub></b> | <b>O<sub>3</sub></b> | <b>PM<sub>2.5</sub></b> | <b>PM<sub>10</sub></b> |
| Jan-19                                                 | 56.8      | -9.1                  | 1.7                   | 8.4                  | 9.2                     | -5.6                   |
| Jan-20                                                 | 10.1      | -25.3                 | -6.7                  | 0.8                  | 3.4                     | -13.1                  |
| Jan-21                                                 | 5.0       | -18.5                 | -74.4                 | 2.2                  | -2.5                    | -37.5                  |
| Jan-22                                                 | 0.0       | -18.0                 | -46.1                 | 10.7                 | 5.2                     | -31.8                  |
| Feb-19                                                 | 30.8      | 5.4                   | 36.5                  | -7.0                 | 10.4                    | 12.6                   |
| Feb-20                                                 | 3.6       | -34.3                 | -11.2                 | 18.4                 | -38.8                   | -9.2                   |
| Feb-21                                                 | 19.6      | -11.8                 | -38.3                 | 9.0                  | -8.4                    | 3.2                    |
| Feb-22                                                 | -18.9     | -26.0                 | -32.3                 | 23.1                 | -23.8                   | -16.7                  |
| Mar-19                                                 | -3.2      | -21.7                 | 25.1                  | 6.1                  | -5.5                    | -5.1                   |
| Mar-20                                                 | 7.7       | -25.7                 | -35.3                 | 6.1                  | -16.9                   | -18.2                  |
| Mar-21                                                 | 16.2      | -6.8                  | 6.4                   | 8.4                  | -1.4                    | 11.0                   |
| Mar-22                                                 | -1.3      | -0.5                  | -20.8                 | 11.6                 | 15.6                    | 18.2                   |
| Average value                                          | 10.5      | -16.0                 | -16.3                 | 8.2                  | -4.5                    | -7.7                   |

| Variation, % compared with baseline period (2015–2018) |           |                       |                       |                      |                         |                        |
|--------------------------------------------------------|-----------|-----------------------|-----------------------|----------------------|-------------------------|------------------------|
| <b>Spain</b>                                           | <b>CO</b> | <b>NO<sub>2</sub></b> | <b>SO<sub>2</sub></b> | <b>O<sub>3</sub></b> | <b>PM<sub>2.5</sub></b> | <b>PM<sub>10</sub></b> |
| Jan-19                                                 | 30.8      | −9.6                  | −3.8                  | 9.5                  | 0.5                     | 1.7                    |
| Jan-20                                                 | 10.6      | −15.7                 | −2.8                  | 12.5                 | 6.0                     | 1.2                    |
| Jan-21                                                 | 23.3      | −37.3                 | −15.2                 | 3.3                  | −14.8                   | −16.1                  |
| Jan-22                                                 | −360.1    | −18.9                 | −37.8                 | 8.4                  | 2.8                     | 1.0                    |
| Feb-19                                                 | 32.7      | 16.6                  | 11.9                  | 11.7                 | 23.2                    | 17.5                   |
| Feb-20                                                 | 31.3      | −5.8                  | −1.3                  | −4.1                 | 20.3                    | 16.0                   |
| Feb-21                                                 | 12.2      | −39.1                 | −30.5                 | 1.9                  | 0.4                     | 9.4                    |
| Feb-22                                                 | −346.9    | −8.7                  | −7.6                  | 1.3                  | −0.5                    | −3.0                   |
| Mar-19                                                 | 17.9      | −6.4                  | −8.2                  | 9.6                  | 4.7                     | 6.3                    |
| Mar-20                                                 | 17.0      | −56.6                 | −46.3                 | −3.3                 | 4.0                     | −15.4                  |
| Mar-21                                                 | 9.7       | −31.3                 | −25.6                 | 0.6                  | −8.0                    | 7.3                    |
| Mar-22                                                 | −363.7    | −53.2                 | −55.2                 | −0.6                 | 8.8                     | 40.6                   |
| Average value                                          | −73.8     | −22.2                 | −18.5                 | 4.2                  | 3.9                     | 5.5                    |
| Variation, % compared with baseline period (2015–2018) |           |                       |                       |                      |                         |                        |
| <b>France</b>                                          | <b>CO</b> | <b>NO<sub>2</sub></b> | <b>SO<sub>2</sub></b> | <b>O<sub>3</sub></b> | <b>PM<sub>2.5</sub></b> | <b>PM<sub>10</sub></b> |
| Jan-19                                                 | −261.2    | 1.7                   | −31.3                 | 0.1                  | −6.0                    | −6.8                   |
| Jan-20                                                 | −4667.5   | −3.2                  | −46.2                 | −2.8                 | −4.7                    | −8.4                   |
| Jan-21                                                 | −4667.5   | −24.2                 | −30.7                 | −6.2                 | −6.5                    | −3.6                   |
| Jan-22                                                 | −4667.5   | −24.2                 | −48.3                 | −5.3                 | 5.9                     | −3.4                   |
| Feb-19                                                 | −81.8     | 20.3                  | 5.4                   | 7.4                  | 10.9                    | 24.6                   |
| Feb-20                                                 | −4607.5   | −18.8                 | −47.0                 | 8.6                  | −43.5                   | −17.8                  |
| Feb-21                                                 | −4607.5   | −29.4                 | −50.5                 | −2.5                 | −11.1                   | −0.5                   |
| Feb-22                                                 | −4607.5   | −31.2                 | −12.3                 | 14.4                 | −26.8                   | −15.8                  |
| Mar-19                                                 | −390.9    | −8.6                  | −7.7                  | 11.1                 | −29.5                   | −6.1                   |
| Mar-20                                                 | −4367.5   | −53.4                 | −61.8                 | 2.4                  | −23.8                   | −10.0                  |
| Mar-21                                                 | −4367.5   | −28.0                 | 17.0                  | 0.4                  | −8.9                    | 13.2                   |
| Mar-22                                                 | −4367.5   | −15.9                 | −88.8                 | 14.9                 | 7.0                     | 12.5                   |
| Average value                                          | −3471.8   | −17.9                 | −33.5                 | 3.6                  | −11.4                   | −1.8                   |
| Variation, % compared with baseline period (2015–2018) |           |                       |                       |                      |                         |                        |
| <b>United Kingdom</b>                                  | <b>CO</b> | <b>NO<sub>2</sub></b> | <b>SO<sub>2</sub></b> | <b>O<sub>3</sub></b> | <b>PM<sub>2.5</sub></b> | <b>PM<sub>10</sub></b> |
| Jan-19                                                 | −9.3      | 5.2                   | −22.6                 | 15.4                 | 11.3                    | 29.6                   |
| Jan-20                                                 | −32.7     | −6.5                  | −7.6                  | 5.4                  | −15.1                   | −11.6                  |
| Jan-21                                                 | −15.6     | −28.0                 | −52.7                 | −10.7                | −9.0                    | −22.5                  |
| Jan-22                                                 | −49.8     | −18.6                 | −54.6                 | 3.5                  | 24.1                    | 7.8                    |
| Feb-19                                                 | 29.9      | 8.1                   | −16.0                 | 8.5                  | 19.6                    | 41.3                   |
| Feb-20                                                 | −8.9      | −26.8                 | 1.3                   | 11.3                 | −28.6                   | −37.1                  |
| Feb-21                                                 | 9.9       | −42.4                 | −79.5                 | 6.6                  | −14.1                   | −29.2                  |
| Feb-22                                                 | −23.4     | −56.8                 | 83.6                  | 17.2                 | −37.9                   | −48.7                  |
| Mar-19                                                 | −20.8     | −12.8                 | −47.2                 | 11.0                 | −11.2                   | −15.9                  |
| Mar-20                                                 | −37.7     | −25.1                 | −26.5                 | 7.9                  | −11.8                   | −5.3                   |
| Mar-21                                                 | −3.7      | −37.0                 | −52.9                 | −0.3                 | −2.5                    | −1.3                   |
| Mar-22                                                 | −70.6     | −39.9                 | −39.8                 | 10.2                 | 16.4                    | 8.4                    |
| Average value                                          | −19.4     | −23.4                 | −26.2                 | 7.2                  | −4.9                    | −7.0                   |
| Variation, % compared with baseline period (2015–2018) |           |                       |                       |                      |                         |                        |
| <b>Croatia</b>                                         | <b>CO</b> | <b>NO<sub>2</sub></b> | <b>SO<sub>2</sub></b> | <b>O<sub>3</sub></b> | <b>PM<sub>2.5</sub></b> | <b>PM<sub>10</sub></b> |
| Jan-19                                                 | 0.0       | −12.7                 | −51.0                 | 0.8                  | −70.6                   | −17.7                  |
| Jan-20                                                 | 0.0       | 13.6                  | −146.1                | 3.3                  | −8.3                    | 23.1                   |
| Jan-21                                                 | 0.0       | −38.0                 | −168.8                | −10.1                | −16.1                   | −19.0                  |

|                                                        |           |                       |                       |                      |                         |                        |
|--------------------------------------------------------|-----------|-----------------------|-----------------------|----------------------|-------------------------|------------------------|
| Jan-22                                                 | 0.0       | -14.7                 | -80.3                 | -2.6                 | 28.4                    | 5.3                    |
| Feb-19                                                 | 0.0       | 18.4                  | 30.2                  | 5.6                  | -18.9                   | 14.5                   |
| Feb-20                                                 | 0.0       | 1.5                   | -43.0                 | 17.6                 | -13.3                   | -9.0                   |
| Feb-21                                                 | 0.0       | 5.1                   | -18.4                 | -23.3                | -2.6                    | 19.2                   |
| Feb-22                                                 | 0.0       | -16.3                 | -32.7                 | 8.4                  | -1.2                    | -12.2                  |
| Mar-19                                                 | 0.0       | 4.1                   | -84.2                 | -4.0                 | -56.7                   | 3.0                    |
| Mar-20                                                 | 0.0       | -37.9                 | -18.6                 | 6.0                  | -13.8                   | 18.8                   |
| Mar-21                                                 | 0.0       | -7.3                  | -51.3                 | -9.9                 | 10.3                    | 15.4                   |
| Mar-22                                                 | 0.0       | -12.9                 | -56.5                 | 7.8                  | 20.3                    | 26.5                   |
| Average value                                          | 0.0       | -8.1                  | -60.1                 | -0.02                | -11.9                   | 5.7                    |
| Variation, % compared with baseline period (2015–2018) |           |                       |                       |                      |                         |                        |
| <b>Poland</b>                                          | <b>CO</b> | <b>NO<sub>2</sub></b> | <b>SO<sub>2</sub></b> | <b>O<sub>3</sub></b> | <b>PM<sub>2.5</sub></b> | <b>PM<sub>10</sub></b> |
| Jan-19                                                 | -1.0      | 12.1                  | -24.6                 | 21.0                 | 34.8                    | -18.6                  |
| Jan-20                                                 | -7.7      | 5.2                   | -23.5                 | 12.7                 | 35.8                    | -22.7                  |
| Jan-21                                                 | 1.0       | 2.0                   | -22.4                 | 6.5                  | 39.6                    | 50.5                   |
| Jan-22                                                 | -23.5     | -9.1                  | -56.2                 | 26.3                 | 19.6                    | -38.1                  |
| Feb-19                                                 | -8.8      | 13.1                  | -4.6                  | 22.4                 | 4.6                     | -19.0                  |
| Feb-20                                                 | -36.8     | -11.9                 | -49.9                 | 28.0                 | -31.4                   | -72.6                  |
| Feb-21                                                 | 5.3       | 12.5                  | 14.6                  | 86.6                 | 11.0                    | 1.4                    |
| Feb-22                                                 | -41.0     | -16.3                 | -52.4                 | 29.8                 | -47.9                   | -63.2                  |
| Mar-19                                                 | -0.3      | 6.5                   | -14.6                 | 23.4                 | -7.7                    | -17.5                  |
| Mar-20                                                 | -12.2     | -5.6                  | -23.5                 | 23.1                 | 4.9                     | -20.4                  |
| Mar-21                                                 | 11.8      | 7.7                   | -31.8                 | 18.3                 | 5.6                     | 3.2                    |
| Mar-22                                                 | -1.5      | 18.1                  | -2.7                  | 29.3                 | 14.8                    | 15.6                   |
| Average value                                          | -9.6      | 2.9                   | -24.3                 | 27.3                 | 7.0                     | -16.8                  |
| Variation, % compared with baseline period (2015–2018) |           |                       |                       |                      |                         |                        |
| <b>Australia</b>                                       | <b>CO</b> | <b>NO<sub>2</sub></b> | <b>SO<sub>2</sub></b> | <b>O<sub>3</sub></b> | <b>PM<sub>2.5</sub></b> | <b>PM<sub>10</sub></b> |
| Jan-19                                                 | -115.9    | -190.9                | -47.9                 | -70.5                | -2.2                    | 12.9                   |
| Jan-20                                                 | 0.2       | -96.2                 | -121.6                | -41.9                | 56.5                    | 57.5                   |
| Jan-21                                                 | -61.1     | -163.4                | -50.2                 | -86.4                | 30.9                    | 43.6                   |
| Jan-22                                                 | -80.9     | -222.6                | -119.3                | -76.9                | 13.6                    | 15.2                   |
| Feb-19                                                 | -114.7    | -186.3                | -96.8                 | -118.9               | -18.4                   | -4.1                   |
| Feb-20                                                 | -37.6     | -117.0                | -166.4                | -79.4                | 30.6                    | 23.8                   |
| Feb-21                                                 | 28.2      | -163.8                | -171.0                | -112.2               | 24.7                    | 16.4                   |
| Feb-22                                                 | -54.5     | -146.9                | -122.0                | -75.8                | 23.9                    | 17.9                   |
| Mar-19                                                 | -136.4    | -187.4                | -85.6                 | -120.9               | -18.4                   | 6.0                    |
| Mar-20                                                 | -61.4     | -105.5                | -6.5                  | -94.1                | 18.2                    | 20.9                   |
| Mar-21                                                 | -49.7     | -125.5                | -83.7                 | -96.3                | 33.4                    | 30.8                   |
| Mar-22                                                 | -33.8     | -139.1                | -108.4                | -74.9                | 12.8                    | 9.6                    |
| Average value                                          | -59.8     | -153.7                | -98.3                 | -87.3                | 17.1                    | 20.9                   |
